# Supplementary figures and images for: MicroRNA-138 controls hippocampal interneuron function and short-term memory in mice
Source: eLife journal article supplement (doi:10.7554/elife.74056), 2022-03-15

Supplementary Figure1

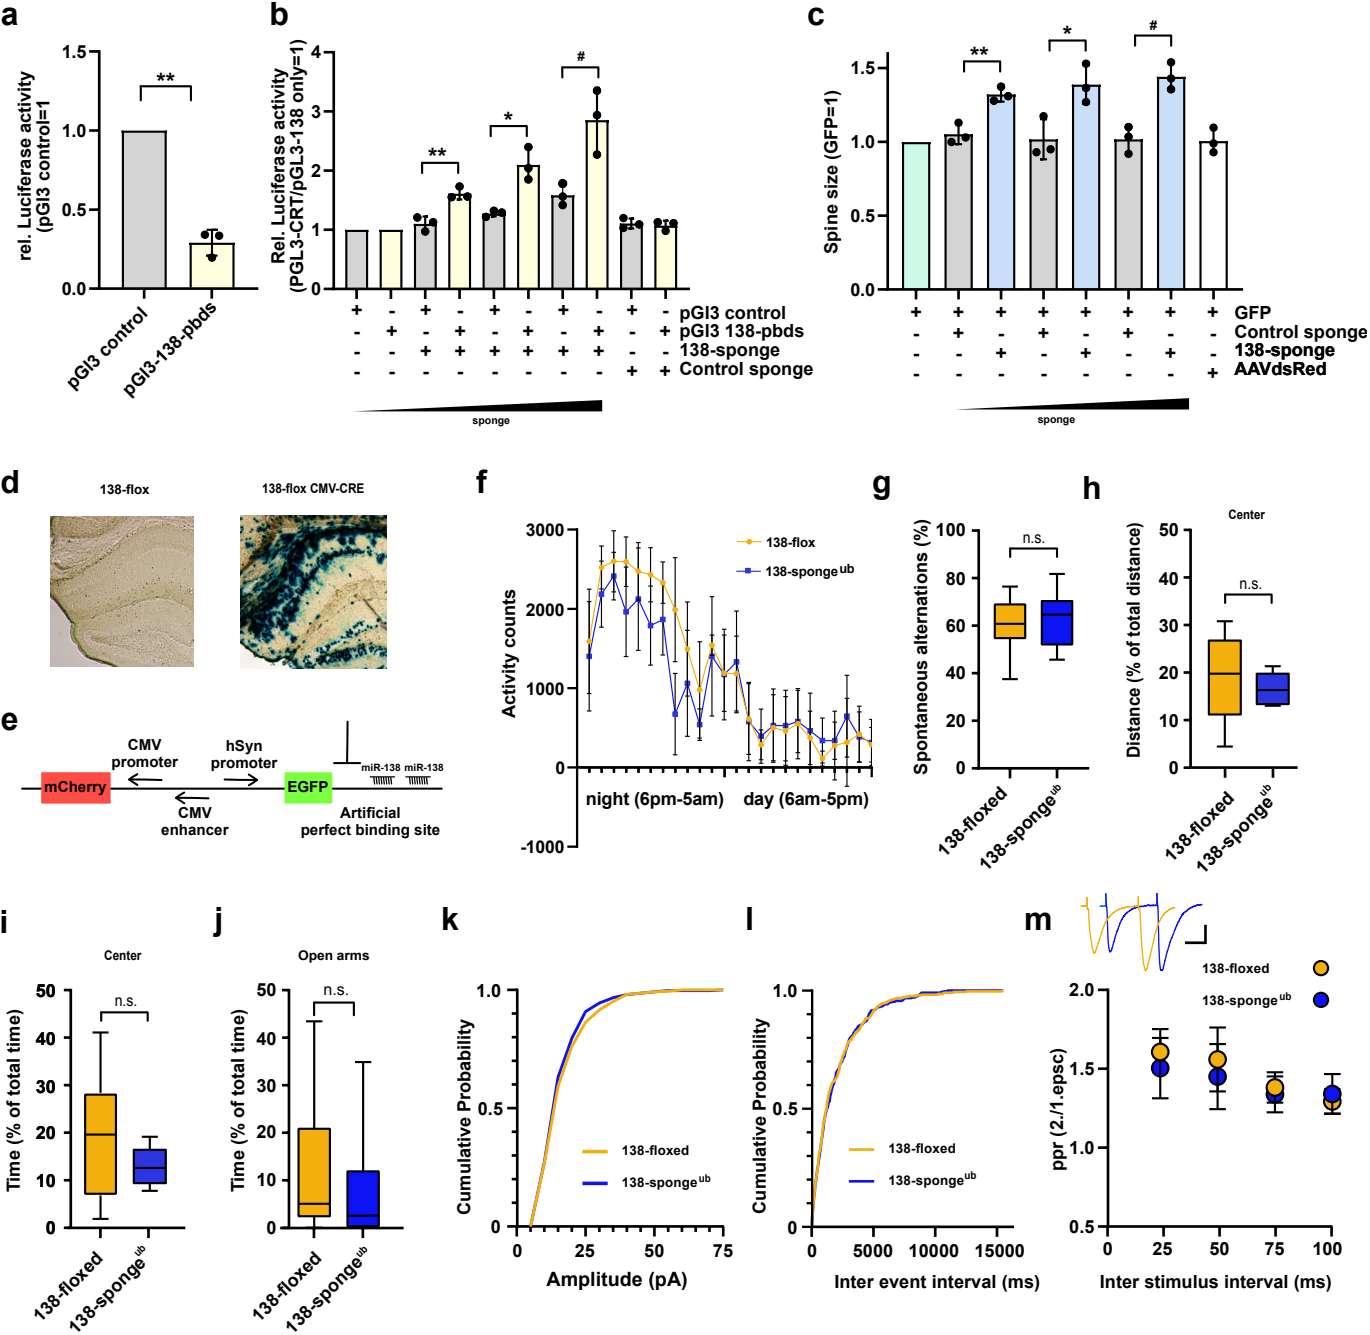

Supplement: supp [file elife-74056-supp-v1.zip]

Supplementary Figure 4

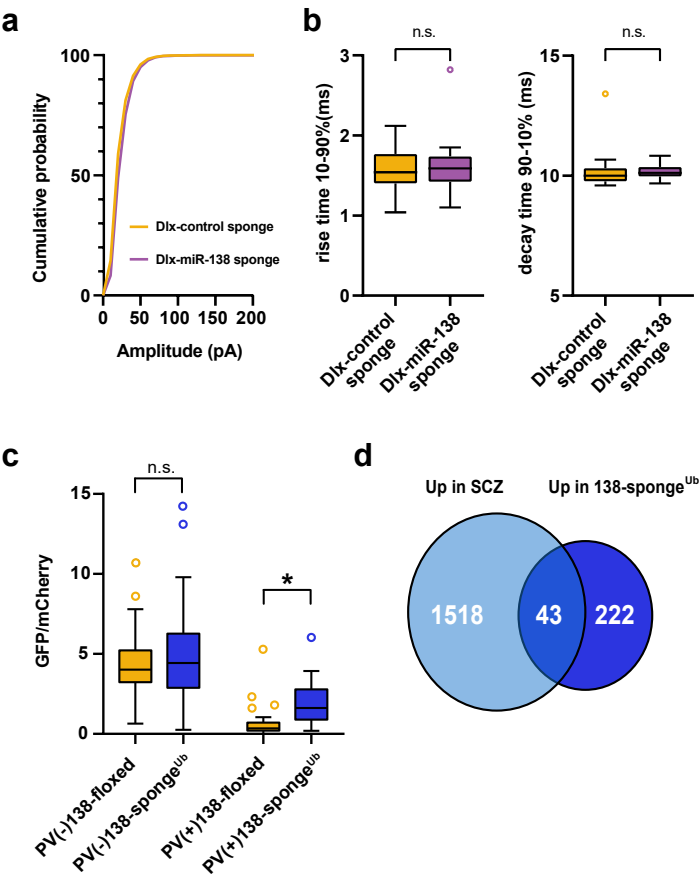

Supplement: supp [file elife-74056-supp-v1.zip]

Supplementary Figure 6

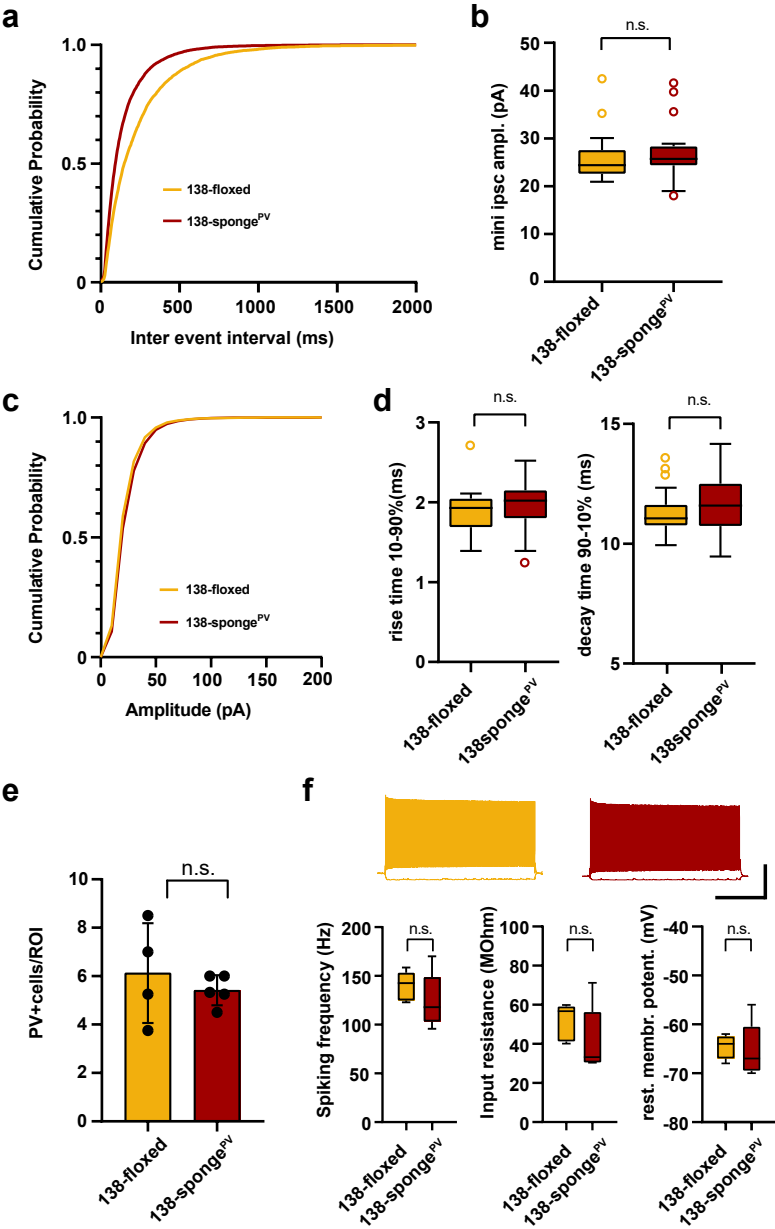

Supplement: supp [file elife-74056-supp-v1.zip]

Supplementary Figure 5

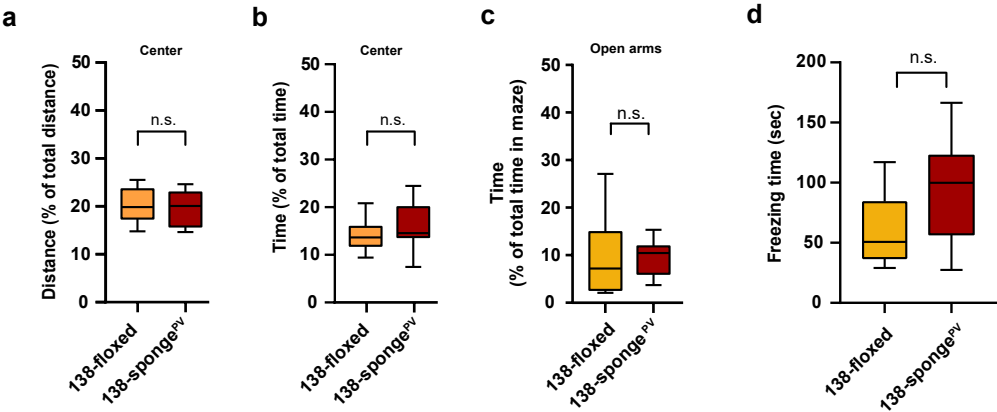

Supplement: supp [file elife-74056-supp-v1.zip]

Supplementary Figure 3

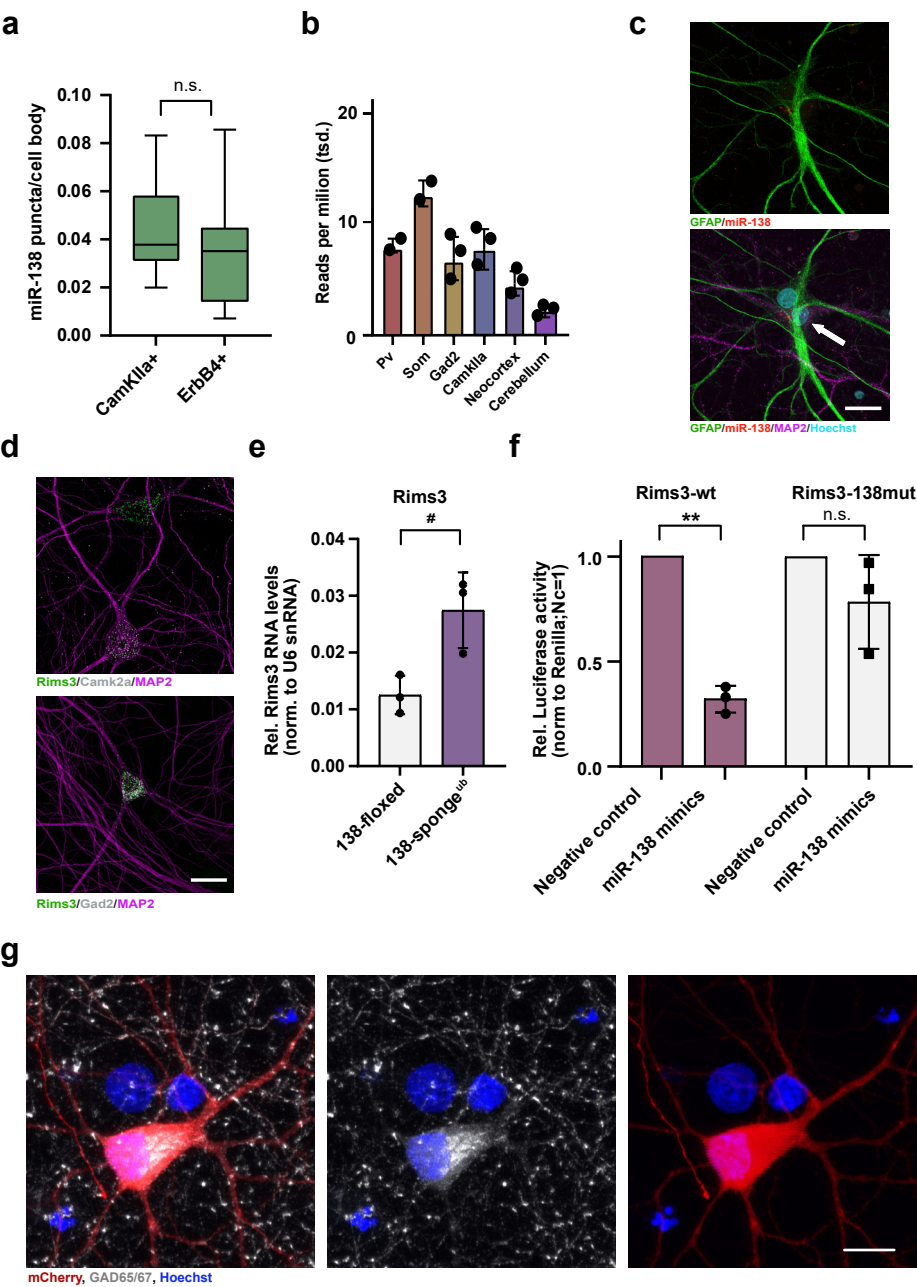

Supplement: supp [file elife-74056-supp-v1.zip]

Supplementary Figure 2

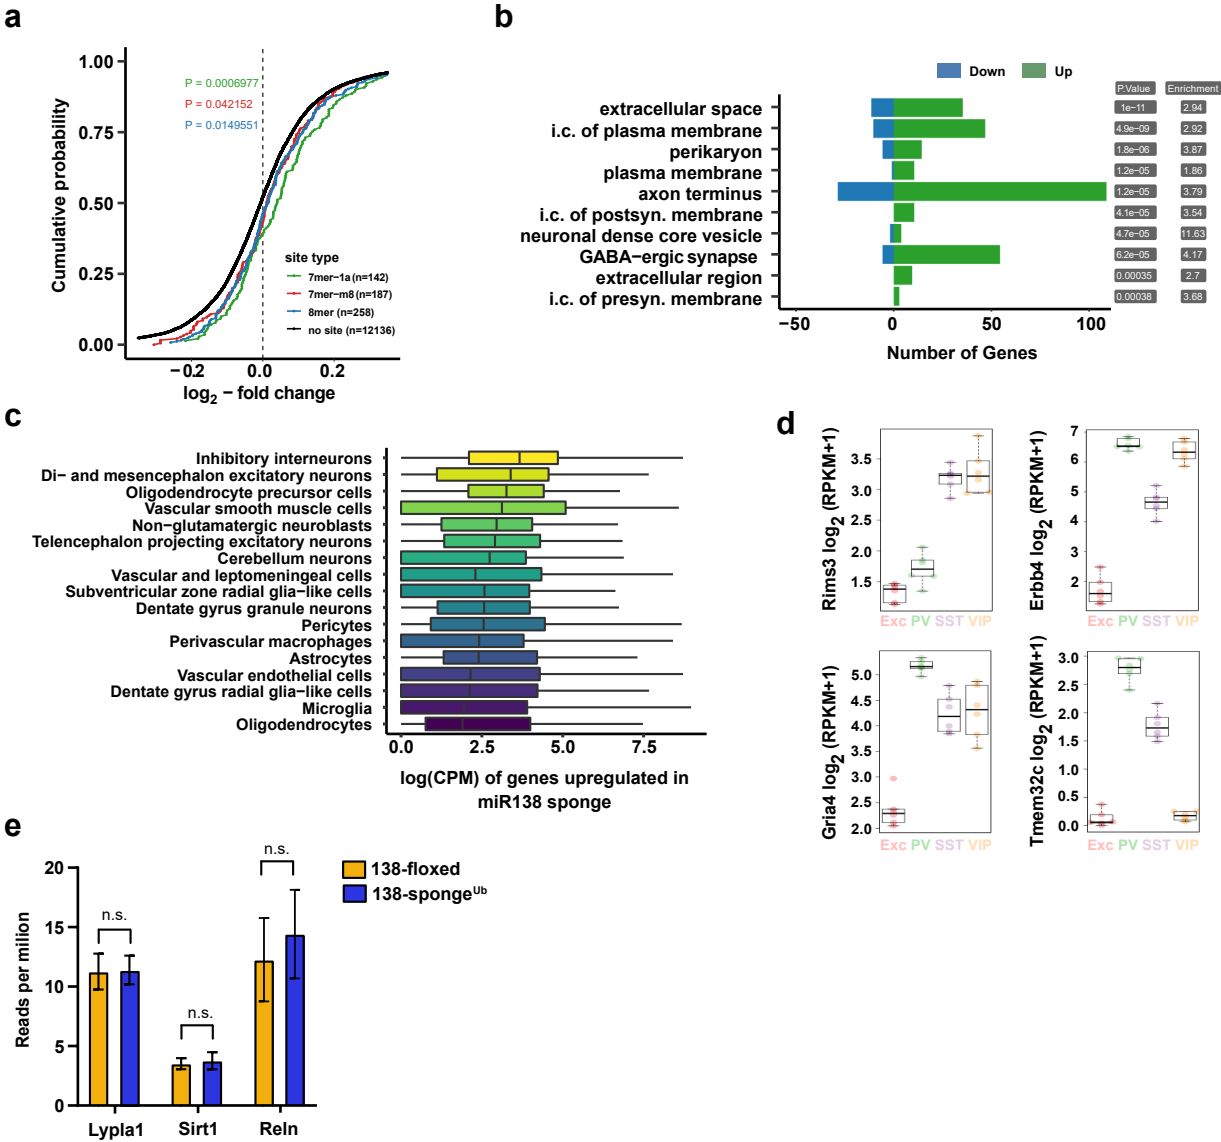

Supplement: supp [file elife-74056-supp-v1.zip]
